# Supplementary material
Source: Research Square preprint supplement (doi:10.21203/rs.3.rs-9128826/v1)
Supplement: Supplementary file 1 [file 3da10beac01e3a16beeb82c8.docx]

**Table 1:** Topological algorithms of the extracted hub genes

| Hub genes | symbol | Degree | MCC | Closeness | EPC | Bottle Neck | EcCentricity | Betweenness |
| --- | --- | --- | --- | --- | --- | --- | --- | --- |
| Albumin | ALB | 53 | 6.95E+17 | 60.5 | 19 | 11 | 0.493 | 650.23 |
| Interleukin-6 | IL6 | 43 | 6.95E+17 | 55 | 19 | 3 | 0.329 | 99 |
| Tumor Necrosis Factor | TNF | 42 | 6.95E+17 | 55 | 19 | 3 | 0.329 | 89.5 |
| Apolipoprotein E | APOE | 42 | 6.95E+17 | 55 | 18 | 3 | 0.329 | 169.1 |
| Tumor Protein p53 | TP53 | 41 | 6.95E+17 | 54 | 18 | 4 | 0.329 | 377.1 |
| Interleukin-1 beta | IL1B | 41 | 6.95E+17 | 54 | 18 | 4 | 0.329 | 123.1 |
| Chemokine (C-C motif) Ligand 2 | CCL2 | 38 | 6.95E+17 | 53 | 18 | 3 | 0.329 | - |
| Hypoxia Inducible Factor 1, Alpha Subunit | HIF1A | 37 | 6.95E+17 | 54 | 17.8 | 3 | 0.329 | - |
| Glutathione Peroxidase 3 | GPX3 | 36 | - | 52 | 17.4 | 3 | 0.329 | 72.7 |
| Heme Oxygenase 1 | HMOX1 | 36 | 6.95E+17 | 52 | 18 | 1 | 0.329 | - |
